# Supplementary material for: Somatic Copy Number Alterations and Associated Genes in Clear-Cell Renal-Cell Carcinoma in Brazilian Patients
Source: MDPI journal article supplement (doi:10.3390/ijms22052265), 2021-02-25
Supplement: s1 [file s1]

# Supplementary Materials: Somatic Copy Number Alterations and Associated Genes in Clear-Cell Renal-Cell Carcinoma in Brazilian Patients

Flávia Gonçalves Fernandes<sup>1</sup>, Henrique Cesar Santejo Silveira<sup>1</sup>, João Neif Antonio Júnior<sup>2</sup>, Rosana Antunes da Silveira<sup>1</sup>, Luis Eduardo Zucca<sup>2</sup>, Flavio Mavignier Cárcano<sup>2,3</sup>, André Octavio Nicolau Sanches<sup>2</sup>, Luciano Neder<sup>4</sup>, Cristovam Scapulatempo-Neto<sup>4</sup>, Sergio Vicente Serrano<sup>2,3</sup>, Eric Jonasch<sup>5</sup>, Rui Manuel Reis<sup>1,6,7\*</sup>  and Adriane Feijó Evangelista<sup>1\*</sup> 

**Table S1.** Summary of the main risk factors associated with ccRCC patients.

| Clinical Data | Category                  | Patients (Frequency) |
|---------------|---------------------------|----------------------|
| Obesity       | Yes                       | 31 (33.6%)           |
|               | No                        | 61 (66.3%)           |
| Smoke         | Yes                       | 14 (15.2%)           |
|               | No                        | 56 (60.8%)           |
|               | Former smoker             | 17 (18.4%)           |
|               | Unknown                   | 5 (5.4%)             |
| Alcohol       | Yes                       | 19 (20.6%)           |
|               | No                        | 67 (72.8%)           |
|               | Unknown                   | 6 (6.5%)             |
| Conditions    | Diabetes                  | 21 (22.8%)           |
|               | Hypertension              | 50 (54.3%)           |
|               | Diabetes and Hypertension | 20 (21.7%)           |
|               | Other                     | 8 (8.6%)             |

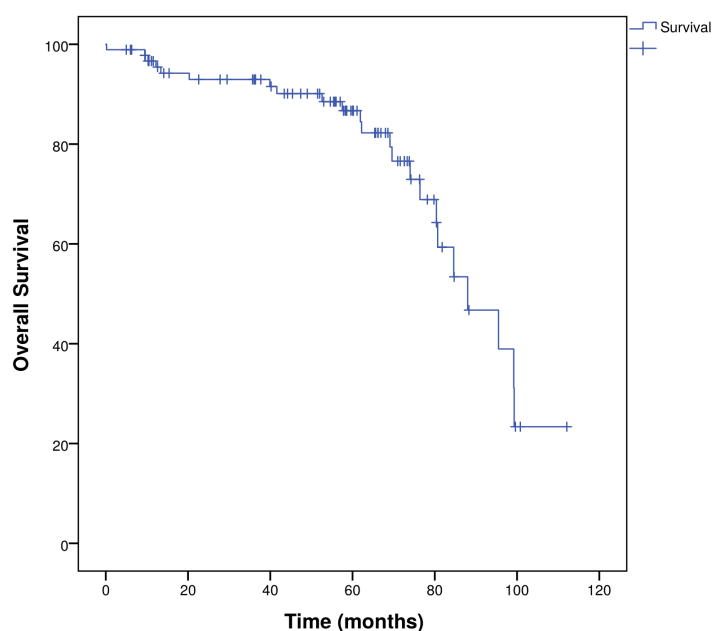

**Figure S1.** Overall survival of the 92 ccRCC patients.

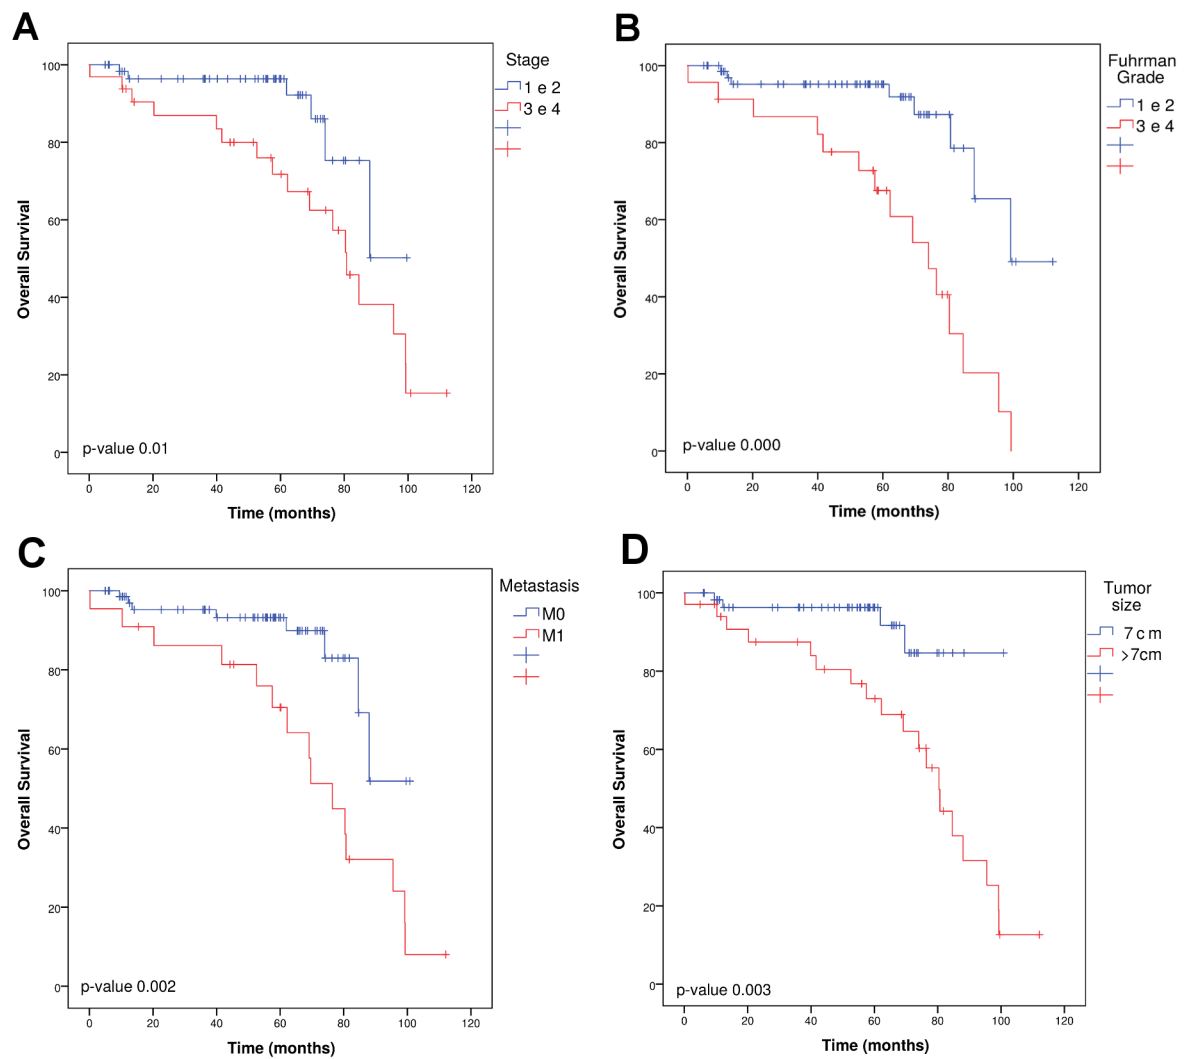

**Figure S2.** Kaplan Meier plots according to stage (A), histological grade (B), metastasis (C) and tumor size (D).
